# Supplementary material for: High throughput methodology for investigating green hydrogen generating processes using colorimetric detection films and machine vision
Source: Royal Society of Chemistry journal article supplement (doi:10.1039/d4dd00070f), 2024-01-01
Supplement: d4dd00070f2.zip [file d4dd00070f2.zip]

## Making a Mask in GIMP

---

An image of the films without any hydrogen evolved was opened into the free and open-source raster graphics editor, GIMP (see Figure S1). The paintbrush tool was used with the hardness set to 100, size of 100 pixels, and in the color black. Black circles were placed in every well. Next the Value Invert option was applied to the image followed by the Threshold option in which the slider was moved all the way to the right side. This converts the black circles to white and all of the remaining pixels to black (see Figure S1).

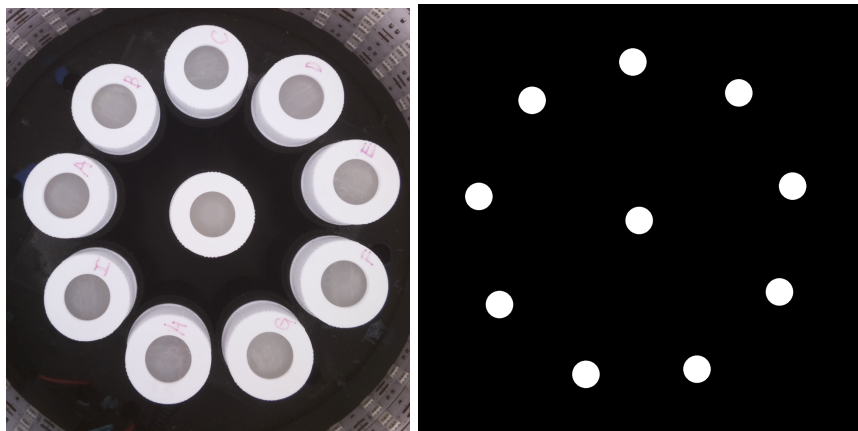

**Figure S1.** Image of films (left) and its corresponding mask (right).
