# Supplementary material for: High throughput methodology for investigating green hydrogen generating processes using colorimetric detection films and machine vision
Source: Royal Society of Chemistry journal article supplement (doi:10.1039/d4dd00070f), 2024-01-01

**Supplementary material for**

**High Throughput Methodology for Investigating Green Hydrogen Generating Processes using Colorimetric Detection Films and Machine Vision**

Savannah Talledo, Andrew Kubaney, Mitchell A. Baumer, Keegan Pietrak, Stefan Bernhard\*

**Affiliation:**

Department of Chemistry, Carnegie Mellon University, 4400 Fifth Avenue, Pittsburgh,  
Pennsylvania 15213, United States

**Corresponding Author:**

Stefan Bernhard ([bern@cmu.edu](mailto:bern@cmu.edu))

## **Table of Contents**

|                                                                         |   |
|-------------------------------------------------------------------------|---|
| S1. RaspberryPi and relay board connectivity for 20mL vial photoreactor | 3 |
| S2. Calibration curve for 108 multiwell photoreactor                    | 4 |

Figure S1. RaspberryPi and relay board connectivity for 20mL vial photoreactor:

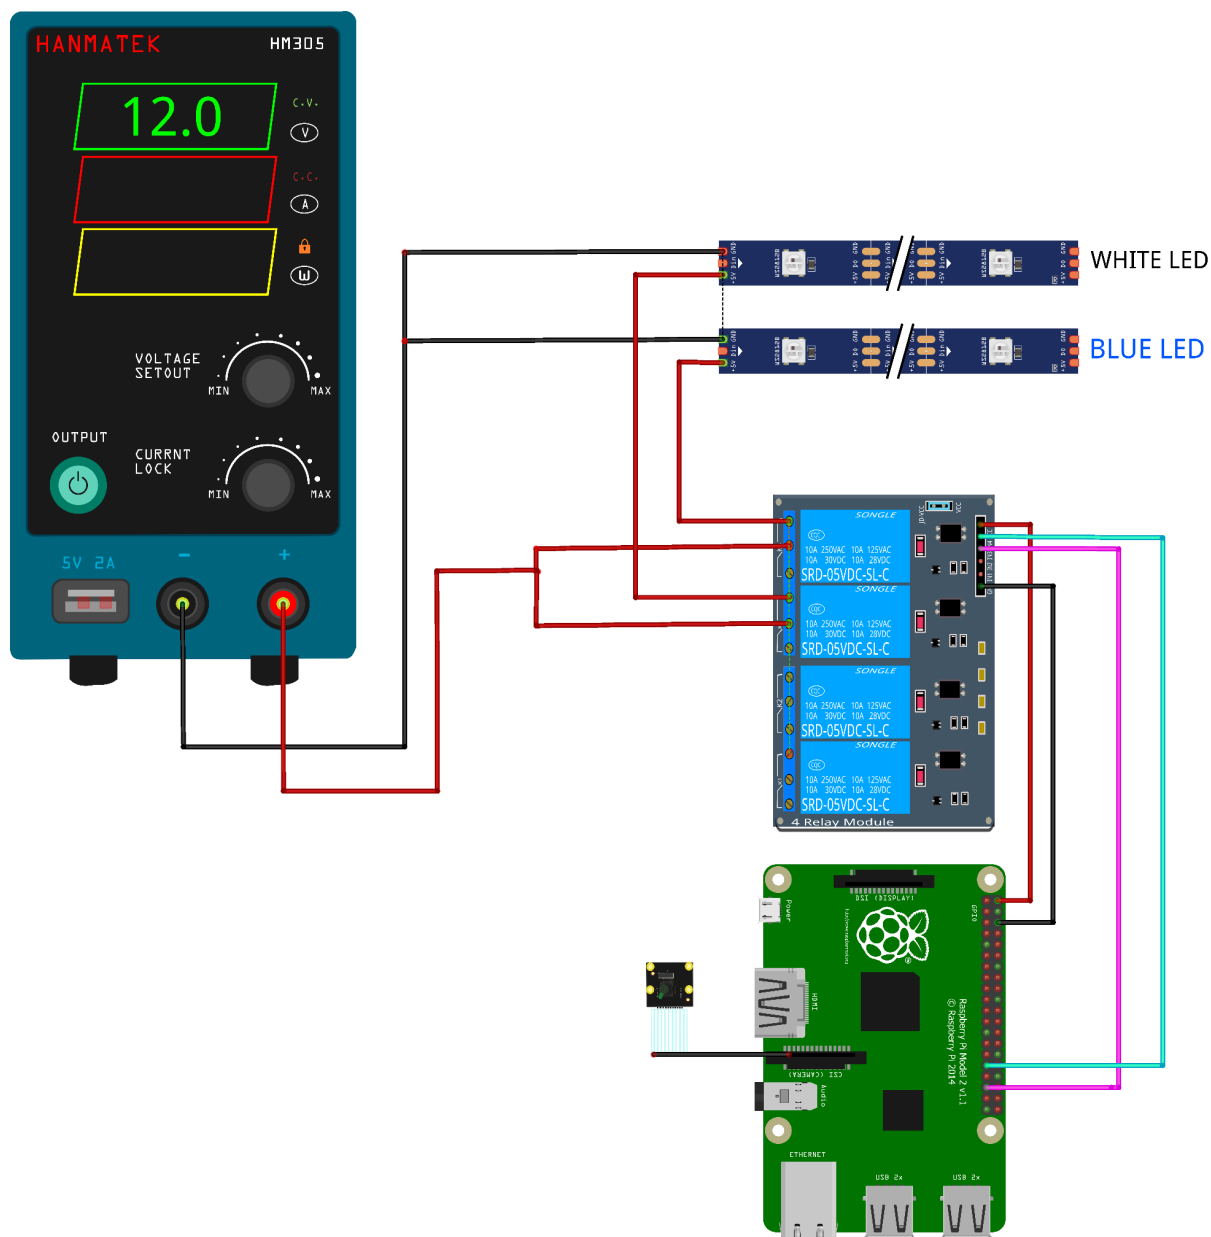

fritzing

Figure S2. Calibration curve for 108 multiwell photoreactor:

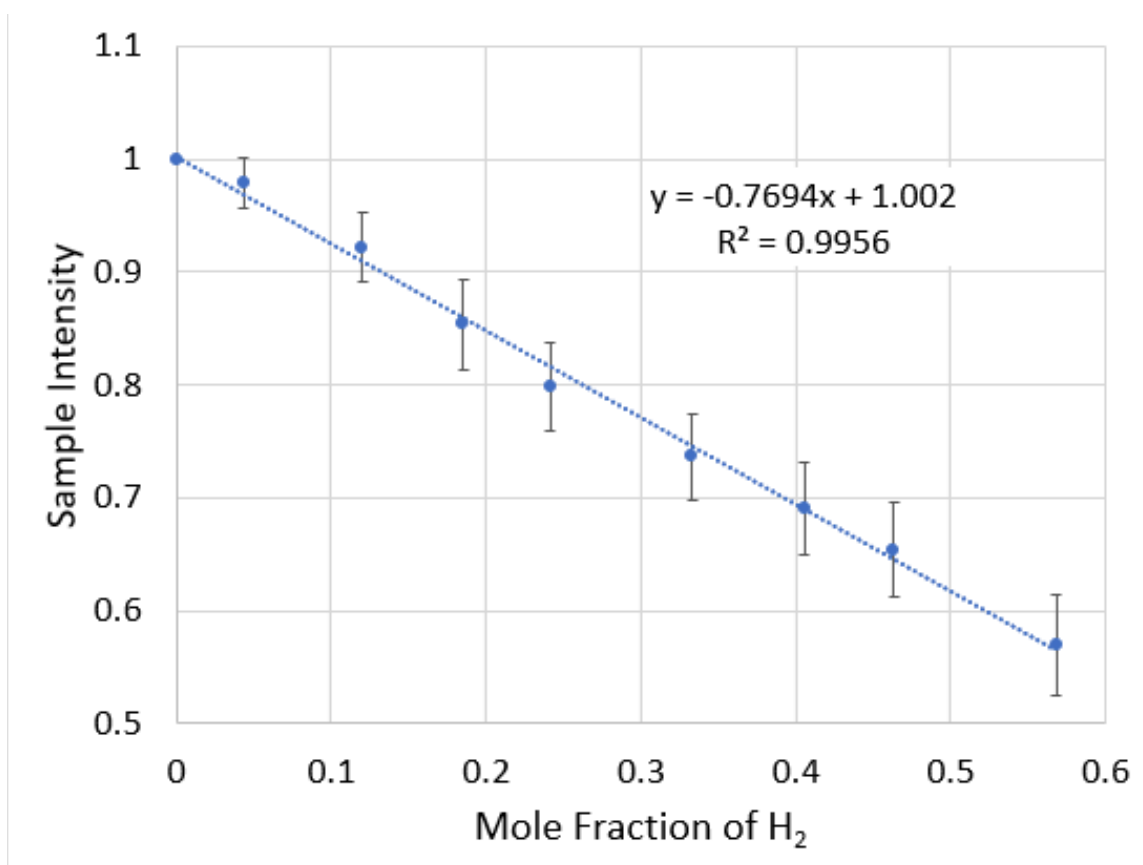

Supplement: d4dd00070f5.pdf [file d4dd00070f5.pdf]
